# Supplementary material for: Growth parameters and responses of green algae across a gradient of phototrophic, mixotrophic and heterotrophic conditions
Source: PeerJ. 2022 Jul 21;10:e13776. doi: 10.7717/peerj.13776 (PMC9308967; doi:10.7717/peerj.13776)
Supplement: Supplemental Information 2 [file peerj-10-13776-s002.xlsx]

## Sheet: Fig1
Figure 1 Raw Data
	time	OD	Ln(OD)
	0	0.62	-0.478036
	16.5	0.635	-0.45413
	23.5	0.6945	-0.364563
	40	2.255	0.81315
	47.75	4.25	1.44692
	64.5	9.63	2.26488
	72.3833	14.55	2.67759
	91	35.25	3.56247
	101	70.605	4.2571
	115	138.595	4.93156
	124.583	196.88	5.28259
	136.083	279.02	5.63128
	144.167	298.355	5.69828
	160.183	317.37	5.76007
	167.733	333	5.80814
	183.7	350	5.85793
	191.75	371.95	5.91876
	209	367.625	5.90706
	215	377.73	5.93418
	232	350	5.85793
	250	341.43	5.83314
	260	340.41	5.83015

## Sheet: Fig2-7
Raw data for figures 2 - 7
Abbreviations: Chlam = Chlamydomonas reinhardtii, Chlor - Chlorella vulgaris; F = chlorophyll a fluorescence; OD - optical density at wavengths indicated, Haem = haemacytometer counts; FC = flow cytometry counts
	Treatment	Chlam F	Chlor F	sd	sd		Treatment	Chlam 600	sd	Chlam 680	sd	Chlam 750	sd		Treatment	Chlor 600	sd	Chlor 680	sd	Chlor 750	sd		Treatment	A600	sd	A680	sd	A750	sd		Treatment	A600	sd	A680	sd	A750	sd		Treatment	Chlam MaxF	sd		Treatment	Chlor MaxF	sd		Treatment	Chlam 600	sd
Mixotrophy	0	0.8097	1.0094	0.1591	0.1947	Growth rate	0	0.9049	0.0598	0.9726	0.0352	0.9503	0.0661	Chlorella	0	1.4287	0.1738	1.1717	0.2082	0.9549	0.0717	maximum biomass	0 g/L	0.2628	0.0062158	0.2765	0.018	0.2701	0.0141	Max biomass	0 g/L	0.2489	0.0611	0.2459	0.1023	0.2459	0.1023	Chlamy	0 g/L	376.452	58.8723	Chlorella	0 g/L	303.09	91.3728	time in exp	0 g/L	3.4375	0.875
Data	1	0.8247	0.9745	0.1146	0.0987	OD	1	0.643	0.0451	0.6164	0.0482	0.6625	0.0472		1	0.9976	0.0951	0.9708	0.1006	0.9974	0.1	achieved	1 g/L	0.2123	0.0147	0.2211	0.0159	0.2109	0.0156	Chlorella	1 g/L	0.4057	0.0674	0.4078	0.0669	0.3712	0.0596	max fluores	1 g/L	227.855	25.222	max fluores	1 g/L	248.415	38.2863	phase	1 g/L	4.3125	0
	2	1.5867	1.0398	0.3469	0.273		2	1.228	0.0902	1.1892	0.0564	1.228	0.0562		2	0.974	0.0753	0.9309	0.0773	0.9549	0.0717	Chlamy	2 g/L	0.2383	0.0121	0.253	0.0107	0.2395	0.0082237		2 g/L	0.2919	0.034	0.3013	0.0336	0.2714	0.0361		2 g/L	192.365	56.4556		2 g/L	225.8	74.6991	OD at 600nm	2 g/L	3.0867	0
	3	1.0193	1.0178	0.1055	0.3263		3	0.9739	0.0448	0.9114	0.0717	0.9803	0.0632		3	1.0765	0.1843	1.0598	0.1847	1.0933	0.1807		3 g/L	0.2445	0.0618	0.2567	0.0561	0.2433	0.0541		3 g/L	0.2642	0.1058	0.2612	0.1158	0.2364	0.1068		3 g/L	262.605	77.4618		3 g/L	142.19	88.2241		3 g/L	3.1875	0
	4	0.9748	0.9793	0.1349	0.0643		4	0.9766	0.0685	0.9348	0.1244	1.0443	0.0835		4	1.3222	0.1991	1.2046	0.0375	1.321	0.1886		4 g/L	0.1686	0.0211	0.1872	0.0229	0.1649	0.0195		4 g/L	0.2375	0.1638	0.2417	0.1741	0.2394	0.1239		4 g/L	149.343	52.4564		4 g/L	192.903	68.9129		4 g/L	3.0919	0.7102
	10	0.5957	1.0196	0.1187	0.2178		10	0.8188	0.0324	0.6819	0.2121	0.7832	0.0905		10	1.0946	0.5412	1.037	0.3575	1.0932	0.2981		10 g/L	0.1663	0.0141	0.1344	0.0118	0.1127	0.01		10 g/L	0.062	0.0236	0.0579	0.0235	0.0502	0.0176		10 g/L	6.8125	2.683		10 g/L	30.63	21.0134		10 g/L	5.125	0
	2 Dark	0.5383	0.4723	0.0412	0.034		2 Dark	1.6811	0.3644	1.5976	0.3232	1.6428	0.353		2 Dark	3.7162	0.1217	3.3209	0.2951	3.2483	0.3141		2g/L Dark	0.1214	0.0497	0.1005	0.0413	0.0861	0.0357		2g/L Dark	0.1712	0.0092572	0.1368	0.0073123	0.1132	0.0065464		2g/L Dark	4.6575	0.4657		2g/L Dark	4.14	0.5461		2g/L Dark	1.8958	0
[truncated: 62 more columns]
